# Supplementary material for: The Relationship Between Clinician Turnover and Client Outcomes in Community Behavioral Health Settings
Source: Atypon-hosted journal article supplement (doi:10.1176/appi.ps.201900169), 2019-09-16
Supplement: appi.ps.201900169.ds001.pdf [file appi.ps.201900169.ds001.pdf]

Supplemental Table 1. Descriptive statistics by site

| Variable                                               | Site 1           |           | Site 2           |           | <i>t</i> | <i>df</i> | <i>p</i> | Number missing |
|--------------------------------------------------------|------------------|-----------|------------------|-----------|----------|-----------|----------|----------------|
|                                                        | (N = 53)         |           | (N = 68)         |           |          |           |          |                |
| <b>Clinician variables</b>                             | <b>Mean</b>      | <b>SD</b> | <b>Mean</b>      | <b>SD</b> |          |           |          |                |
| Age                                                    | 45.5             | 13.9      | 40.4             | 12.2      | 0.9      | 120       | .377     | 0              |
|                                                        | <b>N</b>         | <b>%</b>  | <b>N</b>         | <b>%</b>  | $\chi^2$ | <i>df</i> | <i>p</i> |                |
| Sex, female                                            | 46               | 85        | 48               | 71        | 3.6      | 119       | .056     | 0              |
| Race, white                                            | 53               | 98        | 51               | 76        | 12.0     | 118       | .001     | 1              |
| Job role, case manager or therapist <sup>a</sup>       | 31               | 57        | 37               | 54        | 0.1      | 115       | 0.740    | 4              |
| Clinician employed during the study (did not turnover) | 38               | 72        | 52               | 77        | 0.6      | 119       | .458     | 0              |
|                                                        | <b>(N = 116)</b> |           | <b>(N = 212)</b> |           |          |           |          |                |
| <b>Client Variables</b>                                | <b>Mean</b>      | <b>SD</b> | <b>Mean</b>      | <b>SD</b> | <i>t</i> | <i>df</i> | <i>p</i> |                |
| Age                                                    | 42.9             | 13.9      | 45.9             | 12.5      | -2.0     | 337       | .042     | 0              |
| Familiarity <sup>b</sup>                               | 16.1             | 27.9      | 29.2             | 48.4      | -2.7     | 334       | .007     | 3              |
| Patient activation <sup>c</sup>                        | 60.1             | 13.7      | 62.2             | 15.5      | -1.2     | 336       | .235     | 1              |
| Physical health functioning <sup>d</sup>               | 41.2             | 7.9       | 42.7             | 8.2       | -1.6     | 337       | .107     | 0              |
| Mental health functioning <sup>e</sup>                 | 42.5             | 6.9       | 42.3             | 7.6       | 0.2      | 337       | .806     | 0              |
| Depression <sup>f</sup>                                | 9.6              | 6.4       | 8.4              | 6.2       | 1.6      | 336       | .113     | 1              |
| Anxiety <sup>g</sup>                                   | 9.1              | 5.9       | 7.3              | 6.3       | 2.7      | 336       | .008     | 1              |
|                                                        | <b>N</b>         | <b>%</b>  | <b>N</b>         | <b>%</b>  | $\chi^2$ | <i>df</i> | <i>p</i> |                |
| Sex, female                                            | 65               | 56        | 93               | 44        | 5.2      | 326       | .022     | 0              |
| Race, white                                            | 110              | 95        | 62               | 29        | 134.9    | 326       | .000     | 0              |
| Diagnosis <sup>h</sup> , SMI                           | 48               | 43        | 166              | 79        | 48.0     | 326       | .000     | 13             |

<sup>a</sup> Job roles included ACT team member, medication provider, case manager, and therapist; note only 3 provided medication.

<sup>b</sup> Client-Clinician Familiarity (months)

<sup>c</sup> PAM-MH Scale: 0 – 100, with higher scores indicating greater patient activation

<sup>d</sup> SF-12 Physical Health Scale: 0 – 100, with higher scores indicating better functioning

<sup>e</sup> SF-12 Mental Health Scale: 0 – 100, with higher scores indicating better functioning

<sup>f</sup> PHQ-9: Sum of 9 items, Scale: 0 (not at all) – 3 (nearly every day)

<sup>g</sup> GAD-7: Sum of 7 items, Scale: 0 (not at all) – 3 (nearly every day)

<sup>h</sup> SMI: bipolar disorder, schizophrenia spectrum disorders (schizophrenia was the most common diagnosis)

\*  $p < .05$ ; \*\*  $p < .01$ .
